# Supplementary material for: Extraction of an active enzyme by self-buffering ionic liquids: a green medium for enzymatic research
Source: Royal Society of Chemistry journal article supplement (doi:10.1039/c6ra00607h), 2016-01-01
Supplement: c6ra00607h1.pdf [file c6ra00607h1.pdf]

## Extraction of Active Enzyme by Self-Buffering Ionic Liquids: A Green Medium for Enzymatic Research

Bhupender S. Gupta<sup>a</sup>, Mohamed Taha<sup>a,b</sup>, Ming-Jer Lee<sup>a</sup>

<sup>a</sup> Department of Chemical Engineering, National Taiwan University of Science and Technology, 43 Keelung Road, Section 4, Taipei 106-07, Taiwan

<sup>b</sup> CICECO, Departamento de Química, Universidade de Aveiro 3810-193 Aveiro, Portugal

Table S. 1. Results of NMR analysis and the molecular structures of the synthesized GBILs.

| Compounds   | NMR Analysis                                                                                                                                                                                                                                                                                                                                                                                                                                                                                          | Structure                                                                             |
|-------------|-------------------------------------------------------------------------------------------------------------------------------------------------------------------------------------------------------------------------------------------------------------------------------------------------------------------------------------------------------------------------------------------------------------------------------------------------------------------------------------------------------|---------------------------------------------------------------------------------------|
| [TMA][TAPS] | <sup>1</sup> H NMR (500 MHz, D <sub>2</sub> O/TSP); δ [TMA], 3.21(12H, s, C1-C4's H); δ [TAPS], 3.60 (6H, s, C1-C3's H), 1.92 (2H, quin, C6's H), 2.97 (2H, t, C7's H), 2.75 (2H, t, C5's H). wt% = 0.01, Analytical Calculations for C <sub>11</sub> H <sub>28</sub> N <sub>2</sub> O <sub>6</sub> S (316.41) C 41.72, H 8.85, and N 8.85; Found C 40.71, H 8.87, and N 8.86.                                                                                                                        | 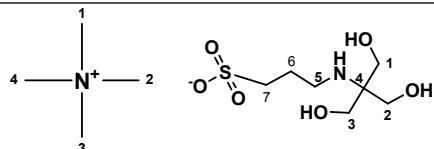   |
| [TEA][TAPS] | <sup>1</sup> H NMR (500 MHz, D <sub>2</sub> O/TSP); δ [TEA], 3.27 (8H, q, C1C3C5C7's H), 1.28 (12H, m, C2C4C6C8's H); δ [TAPS], 3.60 (6H, s, C1-C3's H), 1.92 (2H, quin, C6's H), 2.98 (2H, t, C7's H), 2.74 (2H, t, C5's H). wt% = 0.2, Analytical calculations for C <sub>15</sub> H <sub>36</sub> N <sub>2</sub> O <sub>6</sub> S (372.52) C 48.31, H 9.66, and N 7.52; Found C 48.37, H 9.85, N 7.38.                                                                                             |   |
| [TBA][TAPS] | <sup>1</sup> H NMR (500 MHz, DMSO); δ [TBA], 0.93 (12H, t, C4C8C12C16's H), 1.31 (8H, sext, C3C7C11C15's H), 1.56 (8H, quin, C2C6C10C14's H), 3.17 (8H, t, C1C5C9C13's H); δ [TAPS], 4.18 (6H, s, C1-C3's H), 1.62 (2H, quin, C6's H), 2.54 (2H, t, C7's H), 2.45 (2H, t, C5's H), 3.32 (1H, s, HN), 3.28 (3H, s, HO). wt% = 0.02, Analytical calculations for C <sub>23</sub> H <sub>52</sub> N <sub>2</sub> O <sub>6</sub> S (484.73) C 56.94, H 10.72, and N 5.78; Found C 56.47, H 10.73, N 5.84. |  |
| [TMA][MOPS] | <sup>1</sup> H NMR (500 MHz, D <sub>2</sub> O/TSP); δ [TMA], 3.21(12H, s, C1-C4's H); δ [MOPS], 2.58 (4H, m, C4C6's H), 1.97 (2H, quin, C1's H), 2.53 (2H, t, C2's H), 2.93 (2H, t, C7's H), 3.78 (4H,                                                                                                                                                                                                                                                                                                |  |

|             |                                                                                                                                                                                                                                                                                                                                                                                                                                                                                                                                                        |                                                                                       |
|-------------|--------------------------------------------------------------------------------------------------------------------------------------------------------------------------------------------------------------------------------------------------------------------------------------------------------------------------------------------------------------------------------------------------------------------------------------------------------------------------------------------------------------------------------------------------------|---------------------------------------------------------------------------------------|
|             | <i>t</i> , C3C5's <i>H</i> ). <i>wt%</i> = 0.009                                                                                                                                                                                                                                                                                                                                                                                                                                                                                                       |                                                                                       |
| [TEA][MOPS] | <sup>1</sup> H NMR (500 MHz, D <sub>2</sub> O/TSP); δ [TEA], 3.28 (8H, <i>q</i> , C1C3C5C7's <i>H</i> ), 1.28 (12H, <i>m</i> , C2C4C6C8's <i>H</i> ); δ [MOPS], 2.59 (4H, <i>m</i> , C4C6's <i>H</i> ), 1.97 (2H, <i>quin</i> , C1's <i>H</i> ), 2.53 (2H, <i>t</i> , C2's <i>H</i> ), 2.93 (2H, <i>t</i> , C7's <i>H</i> ), 3.78 (4H, <i>t</i> , C3C5's <i>H</i> ). <i>wt%</i> = 0.25                                                                                                                                                                 | 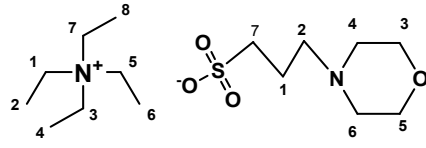   |
| [TBA][MOPS] | <sup>1</sup> H NMR (500 MHz, DMSO); δ [TBA], 0.93 (12H, <i>t</i> , C4C8C12C16's <i>H</i> ), 1.31 (8H, <i>sext</i> , C3C7C11C15's <i>H</i> ), 1.57 (8H, <i>quin</i> , C2C6C10C14's <i>H</i> ), 3.18 (8H, <i>t</i> , C1C5C9C13's <i>H</i> ); δ [MOPS], 2.31 (4H, <i>m</i> , C4C6's <i>H</i> ), 1.58 (2H, <i>quin</i> , C1's <i>H</i> ), 2.39 (2H, <i>t</i> , C2's <i>H</i> ), 2.50 (2H, <i>t</i> , C7's <i>H</i> ), 3.55 (4H, <i>t</i> , C3C5's <i>H</i> ). <i>wt%</i> = 0.3                                                                             |    |
| [TMA][EPPS] | <sup>1</sup> H NMR (500 MHz, D <sub>2</sub> O/TSP); δ [TMA], 3.21(12H, <i>s</i> , C1-C4's <i>H</i> ); δ [EPPS], 2.52 (4H, <i>t</i> , C4C5's <i>H</i> ), 2.59 (4H, <i>t</i> , C3C6's <i>H</i> ), 1.20 (2H, <i>t</i> , C8's <i>H</i> ), 2.93 (2H, <i>t</i> , C1's <i>H</i> ), 3.66 (2H, <i>t</i> , C9's <i>H</i> ), 3.75 (4H, <i>t</i> , C2's <i>H</i> ), 1.95 (2H, <i>quin</i> , C7's <i>H</i> ). <i>wt%</i> = 0.0085                                                                                                                                   |    |
| [TEA][EPPS] | <sup>1</sup> H NMR (500 MHz, D <sub>2</sub> O/TSP); δ [TEA], 3.27 (8H, <i>q</i> , C1C3C5C7's <i>H</i> ), 1.27 (12H, <i>m</i> , C2C4C6C8's <i>H</i> ); δ [EPPS], 2.52 (4H, <i>t</i> , C4C5's <i>H</i> ), 2.59 (4H, <i>t</i> , C3C6's <i>H</i> ), 1.21 (2H, <i>t</i> , C8's <i>H</i> ), 2.92 (2H, <i>t</i> , C1's <i>H</i> ), 3.66 (2H, <i>t</i> , C9's <i>H</i> ), 3.75 (4H, <i>t</i> , C2's <i>H</i> ), 1.95 (2H, <i>quin</i> , C7's <i>H</i> ). <i>wt%</i> = 0.15                                                                                     |   |
| [TBA][EPPS] | <sup>1</sup> H NMR (500 MHz, DMSO); δ [TBA], 0.93 (12H, <i>t</i> , C4C8C12C16's <i>H</i> ), 1.31 (8H, <i>sext</i> , C3C7C11C15's <i>H</i> ), 1.58 (8H, <i>quin</i> , C2C6C10C14's <i>H</i> ), 3.18 (8H, <i>t</i> , C1C5C9C13's <i>H</i> ); δ [EPPS], 2.29 (4H, <i>t</i> , C4C5's <i>H</i> ), 2.37 (4H, <i>t</i> , C3C6's <i>H</i> ), 1.05 (2H, <i>t</i> , C8's <i>H</i> ), 2.50 (2H, <i>t</i> , C1's <i>H</i> ), 3.43 (2H, <i>t</i> , C9's <i>H</i> ), 3.47 (4H, <i>t</i> , C2's <i>H</i> ), 1.69 (2H, <i>quin</i> , C7's <i>H</i> ). <i>wt%</i> = 0.3 |  |
| [TMA][CAPS] | <sup>1</sup> H NMR (500 MHz, D <sub>2</sub> O/TSP); δ [TMA], 3.21(12H, <i>s</i> , C1-C4's <i>H</i> ); δ [CAPS], 1.15-1.31&1.61-1.74 (10H, <i>m</i> , C2-C6's <i>H</i> ), 2.51 (H, <i>m</i> , C1's <i>H</i> ), 2.74 (2H, <i>t</i> , C8's <i>H</i> ), 2.95 (2H, <i>t</i> , C9's <i>H</i> ), 1.91 (2H, <i>quin</i> , C7's <i>H</i> ). <i>wt%</i> = 0.01                                                                                                                                                                                                   |  |

|               |                                                                                                                                                                                                                                                                                                                                                                                                                                                          |  |
|---------------|----------------------------------------------------------------------------------------------------------------------------------------------------------------------------------------------------------------------------------------------------------------------------------------------------------------------------------------------------------------------------------------------------------------------------------------------------------|--|
| [TEA][CAPS]   | $^1\text{H}$ NMR (500 MHz, $\text{D}_2\text{O}/\text{TSP}$ ); $\delta$ [TEA], 3.28 (8H, <i>q</i> , C1C3C5C7's H), 1.29 (12H, <i>m</i> , C2C4C6C8's H); $\delta$ [CAPS], 1.07-1.25 & 1.62-1.75 (10H, <i>m</i> , C2-C6's H), 2.49 (H, <i>m</i> , C1's H), 2.72 (2H, <i>t</i> , C8's H), 2.93 (2H, <i>t</i> , C9's H), 1.92 (2H, <i>quin</i> , C7's H). <i>wt%</i> = 0.27                                                                                   |  |
| [TBA][CAPS]   | $^1\text{H}$ NMR (500 MHz, DMSO); $\delta$ [TBA], 0.93 (12H, <i>t</i> , C4C8C12C16's H), 1.31 (8H, <i>sext</i> , C3C7C11C15's H), 1.56 (8H, <i>quin</i> , C2C6C10C14's H), 3.17 (8H, <i>t</i> , C1C5C9C13's H); $\delta$ [CAPS], 1.08-1.20 & 1.62-1.76 (10H, <i>m</i> , C2-C6's H), 2.29 (H, <i>m</i> , C1's H), 2.39 (2H, <i>t</i> , C8's H), 2.51 (2H, <i>t</i> , C9's H), 1.59 (2H, <i>quin</i> , C7's H), 3.33 (H, <i>s</i> , HN). <i>wt%</i> = 0.29 |  |
| [TMA][BICINE] | $^1\text{H}$ NMR (500 MHz, $\text{D}_2\text{O}/\text{TSP}$ ); $\delta$ [TMA], 3.21 (12H, <i>s</i> , C1-C4's H); $\delta$ [Bicine], 3.67 (4H, <i>t</i> , C2C4's H), 2.80 (4H, <i>t</i> , C3C5's H), 3.26 (2H, <i>s</i> , C1's H). <i>wt%</i> = 0.011                                                                                                                                                                                                      |  |
| [TEA][BICINE] | $^1\text{H}$ NMR (500 MHz, $\text{D}_2\text{O}/\text{TSP}$ ); $\delta$ [TEA], 3.25 (8H, <i>q</i> , C1C3C5C7's H), 1.27 (12H, <i>m</i> , C2C4C6C8's H); $\delta$ [Bicine], 3.65 (4H, <i>t</i> , C2C4's H), 2.78 (4H, <i>t</i> , C3C5's H), 3.23 (2H, <i>s</i> , C1's H). <i>wt%</i> = 0.2                                                                                                                                                                 |  |
| [TBA][BICINE] | $^1\text{H}$ NMR (500 MHz, DMSO); $\delta$ [TBA], 0.93 (12H, <i>t</i> , C4C8C12C16's H), 1.31 (8H, <i>sext</i> , C3C7C11C15's H), 1.57 (8H, <i>quin</i> , C2C6C10C14's H), 3.18 (8H, <i>t</i> , C1C5C9C13's H); $\delta$ [Bicine], 3.44 (4H, <i>t</i> , C2C4's H), 2.30 (4H, <i>t</i> , C3C5's H), 2.85 (2H, <i>s</i> , C1's H). <i>wt%</i> = 0.23                                                                                                       |  |

Table S. 2. Experimental mass fraction data for the binodal curve of the systems GBIL (1) + sodium sulphate (2) at 25°C under atmospheric pressure.

| [TBA][TAPS] |           | [TBA][MOPS] |           | [TBA][EPPS] |           | [TBA][CAPS] |           | [TBA][BICINE] |           |
|-------------|-----------|-------------|-----------|-------------|-----------|-------------|-----------|---------------|-----------|
| 100 $w_1$   | 100 $w_2$ | 100 $w_1$   | 100 $w_2$ | 100 $w_1$   | 100 $w_1$ | 100 $w_2$   | 100 $w_1$ | 100 $w_2$     | 100 $w_1$ |
| 42.41       | 2.91      | 44.35       | 2.10      | 46.66       | 1.47      | 48.21       | 1.72      | 46.61         | 2.02      |
| 39.60       | 4.43      | 39.18       | 4.94      | 43.10       | 3.39      | 44.62       | 3.56      | 43.46         | 3.66      |
| 36.29       | 6.22      | 35.85       | 6.77      | 40.29       | 4.91      | 42.99       | 4.39      | 40.88         | 5.01      |
| 29.01       | 10.16     | 33.56       | 8.04      | 37.50       | 6.41      | 40.55       | 5.64      | 39.34         | 5.81      |
| 26.76       | 11.38     | 32.07       | 8.86      | 35.18       | 7.66      | 38.49       | 6.69      | 37.68         | 6.68      |
| 25.52       | 12.04     | 31.09       | 9.40      | 33.34       | 8.66      | 37.28       | 7.31      | 36.36         | 7.36      |
| 24.30       | 12.70     | 30.17       | 9.90      | 31.94       | 9.41      | 36.08       | 7.92      | 34.94         | 8.10      |
| 23.24       | 13.28     | 28.81       | 10.65     | 30.72       | 10.07     | 34.88       | 8.54      | 33.92         | 8.63      |
| 22.06       | 13.92     | 27.37       | 11.44     | 29.60       | 10.67     | 33.81       | 9.08      | 32.40         | 9.43      |
| 20.26       | 14.89     | 26.03       | 12.18     | 28.66       | 11.18     | 32.89       | 9.55      | 30.45         | 10.44     |
| 19.13       | 15.50     | 25.16       | 12.66     | 27.73       | 11.68     | 31.78       | 10.12     | 29.13         | 11.13     |
| 18.16       | 16.03     | 24.66       | 12.93     | 26.39       | 12.41     | 30.89       | 10.58     | 27.92         | 11.76     |
| 17.15       | 16.57     | 23.85       | 13.38     | 25.14       | 13.08     | 29.69       | 11.19     | 26.92         | 12.28     |
| 15.70       | 17.36     | 23.10       | 13.80     | 24.09       | 13.65     | 28.87       | 11.61     | 25.87         | 12.83     |
| 14.90       | 17.79     | 22.55       | 14.10     | 23.05       | 14.21     | 27.73       | 12.19     | 24.39         | 13.60     |
| 14.12       | 18.21     | 21.62       | 14.61     | 22.22       | 14.65     | 26.29       | 12.92     | 23.36         | 14.14     |
| 13.29       | 18.66     | 20.97       | 14.97     | 21.04       | 15.29     | 24.74       | 13.72     | 21.89         | 14.91     |
| 12.60       | 19.03     | 20.34       | 15.32     | 20.20       | 15.75     | 24.16       | 14.02     | 20.73         | 15.51     |
| 11.62       | 19.56     | 19.80       | 15.61     | 19.24       | 16.26     | 23.61       | 14.29     | 19.36         | 16.23     |
| 11.04       | 19.88     | 19.18       | 15.95     | 18.61       | 16.60     | 22.83       | 14.69     | 17.84         | 17.02     |
| 10.51       | 20.16     | 18.64       | 16.25     | 16.51       | 17.74     | 22.39       | 14.92     | 16.55         | 17.69     |
| 9.72        | 20.59     | 18.01       | 16.60     | 15.76       | 18.14     | 21.15       | 15.55     | 14.68         | 18.66     |
| 9.09        | 20.93     | 17.59       | 16.83     | 15.04       | 18.53     | 20.76       | 15.75     | 13.03         | 19.53     |
| 8.46        | 21.27     | 17.04       | 17.13     | 14.43       | 18.86     | 20.14       | 16.07     | 11.67         | 20.23     |
| 6.92        | 22.10     | 16.51       | 17.42     | 13.64       | 19.29     | 19.58       | 16.35     | 10.28         | 20.96     |
| 6.11        | 22.54     | 15.98       | 17.72     | 11.57       | 20.41     | 19.24       | 16.53     | 8.72          | 21.77     |
| 42.41       | 2.91      | 15.47       | 18.00     | 11.07       | 20.67     | 18.76       | 16.78     | 46.61         | 2.02      |
| 39.60       | 4.43      | 15.04       | 18.23     | 10.74       | 20.85     | 17.99       | 17.17     | 43.46         | 3.66      |
| 36.29       | 6.22      | 14.53       | 18.51     | 10.41       | 21.03     | 17.24       | 17.55     | 40.88         | 5.01      |
| 29.01       | 10.16     | 14.25       | 18.67     | 10.03       | 21.23     | 16.56       | 17.90     | 39.34         | 5.81      |
| 26.76       | 11.38     | 13.77       | 18.93     | 9.75        | 21.38     | 15.95       | 18.21     | 37.68         | 6.68      |
| 25.52       | 12.04     | 13.44       | 19.11     | 9.41        | 21.57     | 16.19       | 18.08     | 36.36         | 7.36      |
| 24.30       | 12.70     | 13.12       | 19.29     | 9.02        | 21.78     | 15.34       | 18.52     | 34.94         | 8.10      |
| 23.24       | 13.28     | 12.82       | 19.46     | 8.67        | 21.97     | 15.12       | 18.63     | 33.92         | 8.63      |
| 22.06       | 13.92     | 12.48       | 19.64     | 8.35        | 22.14     | 14.81       | 18.79     | 32.40         | 9.43      |
| 20.26       | 14.89     | 12.16       | 19.82     | 8.02        | 22.32     | 14.53       | 18.94     | 30.45         | 10.44     |
| 19.13       | 15.50     | 11.84       | 19.99     | 7.79        | 22.44     | 14.25       | 19.08     | 29.13         | 11.13     |
| 18.16       | 16.03     | 11.52       | 20.17     | 7.33        | 22.69     | 13.96       | 19.22     | 27.92         | 11.76     |
| 17.15       | 16.57     | 11.26       | 20.31     | 7.18        | 22.77     | 13.75       | 19.33     | 26.92         | 12.28     |
| 15.70       | 17.36     | 10.99       | 20.46     | 6.96        | 22.89     | 13.40       | 19.51     | 25.87         | 12.83     |
| 14.90       | 17.79     | 10.73       | 20.61     | 6.67        | 23.05     | 13.24       | 19.60     | 24.39         | 13.60     |

**Table S. 2. Continued.**

| [TBA][TAPS] |           | [TBA][MOPS] |           | [TBA][EPPS] |           | [TBA][CAPS] |           | [TBA][BICINE] |           |
|-------------|-----------|-------------|-----------|-------------|-----------|-------------|-----------|---------------|-----------|
| 100 $w_1$   | 100 $w_2$ | 100 $w_1$   | 100 $w_2$ | 100 $w_1$   | 100 $w_1$ | 100 $w_2$   | 100 $w_1$ | 100 $w_2$     | 100 $w_1$ |
| 14.12       | 18.21     | 10.50       | 20.73     | 6.42        | 23.18     | 12.98       | 19.73     | 23.36         | 14.14     |
| 13.29       | 18.66     | 10.16       | 20.92     | 6.19        | 23.31     | 12.86       | 19.79     | 21.89         | 14.91     |
| 12.60       | 19.03     | 9.90        | 21.06     | 6.01        | 23.40     | 12.65       | 19.89     | 20.73         | 15.51     |
| 11.62       | 19.56     | 9.80        | 21.12     | 5.81        | 23.51     | 12.50       | 19.97     | 19.36         | 16.23     |
| 11.04       | 19.88     | 7.30        | 22.50     | 5.57        | 23.64     | 12.26       | 20.10     | 17.84         | 17.02     |
| 10.51       | 20.16     | 7.10        | 22.61     | 5.44        | 23.71     | 12.07       | 20.19     | 16.55         | 17.69     |
| 9.72        | 20.59     | 6.93        | 22.70     | 5.22        | 23.83     | 11.85       | 20.31     | 14.68         | 18.66     |
| 9.09        | 20.93     | 6.75        | 22.80     | 5.02        | 23.94     | 11.62       | 20.42     | 13.03         | 19.53     |
| 8.46        | 21.27     | 6.56        | 22.90     | 4.83        | 24.04     | 11.40       | 20.54     | 11.67         | 20.23     |
| 6.92        | 22.10     | 6.40        | 22.99     | 4.63        | 24.15     | 11.28       | 20.60     | 10.28         | 20.96     |
| 6.11        | 22.54     | 6.20        | 23.10     | 4.46        | 24.24     | 11.10       | 20.69     | 8.72          | 21.77     |
|             |           | 5.99        | 23.22     | 4.28        | 24.33     | 10.80       | 20.84     |               |           |
|             |           | 5.81        | 23.32     | 4.10        | 24.44     | 10.57       | 20.96     |               |           |
|             |           | 5.64        | 23.41     | 3.93        | 24.53     | 10.40       | 21.05     |               |           |
|             |           | 5.49        | 23.49     | 3.66        | 24.67     | 10.24       | 21.13     |               |           |
|             |           | 5.33        | 23.58     | 3.34        | 24.85     | 10.05       | 21.23     |               |           |
|             |           | 5.18        | 23.66     | 3.02        | 25.02     | 9.78        | 21.36     |               |           |
|             |           | 4.90        | 23.82     |             |           | 9.62        | 21.45     |               |           |
|             |           | 4.77        | 23.89     |             |           | 9.48        | 21.52     |               |           |
|             |           | 4.61        | 23.97     |             |           | 9.32        | 21.60     |               |           |
|             |           | 4.51        | 24.03     |             |           | 9.19        | 21.67     |               |           |
|             |           | 4.29        | 24.15     |             |           | 9.07        | 21.73     |               |           |
|             |           | 4.10        | 24.26     |             |           | 8.94        | 21.79     |               |           |
|             |           | 3.93        | 24.35     |             |           | 8.83        | 21.85     |               |           |
|             |           | 3.79        | 24.43     |             |           | 8.65        | 21.94     |               |           |
|             |           | 3.69        | 24.48     |             |           | 8.55        | 21.99     |               |           |
|             |           | 3.54        | 24.57     |             |           | 8.43        | 22.05     |               |           |
|             |           | 3.42        | 24.63     |             |           | 8.32        | 22.11     |               |           |
|             |           | 3.29        | 24.70     |             |           | 8.19        | 22.17     |               |           |
|             |           | 3.14        | 24.79     |             |           | 8.08        | 22.23     |               |           |
|             |           | 2.88        | 24.93     |             |           | 7.85        | 22.35     |               |           |
|             |           | 2.78        | 24.98     |             |           | 7.72        | 22.41     |               |           |
|             |           |             |           |             |           | 7.63        | 22.46     |               |           |
|             |           |             |           |             |           | 7.54        | 22.51     |               |           |
|             |           |             |           |             |           | 7.33        | 22.61     |               |           |
|             |           |             |           |             |           | 7.14        | 22.71     |               |           |
|             |           |             |           |             |           | 6.98        | 22.79     |               |           |
|             |           |             |           |             |           | 6.81        | 22.88     |               |           |
|             |           |             |           |             |           | 6.68        | 22.95     |               |           |
|             |           |             |           |             |           | 6.54        | 23.02     |               |           |
|             |           |             |           |             |           | 6.40        | 23.09     |               |           |

**Table S. 2. Continued**

| [TBA][TAPS] |           | [TBA][MOPS] |           | [TBA][EPPS] |           | [TBA][CAPS] |           | [TBA][BICINE] |           |
|-------------|-----------|-------------|-----------|-------------|-----------|-------------|-----------|---------------|-----------|
| 100 $w_1$   | 100 $w_2$ | 100 $w_1$   | 100 $w_2$ | 100 $w_1$   | 100 $w_1$ | 100 $w_2$   | 100 $w_1$ | 100 $w_2$     | 100 $w_1$ |
|             |           |             |           |             |           | 6.28        | 23.15     |               |           |
|             |           |             |           |             |           | 6.14        | 23.22     |               |           |
|             |           |             |           |             |           | 6.02        | 23.29     |               |           |
|             |           |             |           |             |           | 5.90        | 23.35     |               |           |
|             |           |             |           |             |           | 5.79        | 23.40     |               |           |
|             |           |             |           |             |           | 5.65        | 23.47     |               |           |
|             |           |             |           |             |           | 5.47        | 23.56     |               |           |
|             |           |             |           |             |           | 5.29        | 23.66     |               |           |
|             |           |             |           |             |           | 5.11        | 23.75     |               |           |
|             |           |             |           |             |           | 5.00        | 23.81     |               |           |
|             |           |             |           |             |           | 4.84        | 23.89     |               |           |
|             |           |             |           |             |           | 4.64        | 23.99     |               |           |
|             |           |             |           |             |           | 4.51        | 24.06     |               |           |
|             |           |             |           |             |           | 4.41        | 24.11     |               |           |
|             |           |             |           |             |           | 4.29        | 24.17     |               |           |
|             |           |             |           |             |           | 4.17        | 24.23     |               |           |
|             |           |             |           |             |           | 4.07        | 24.28     |               |           |
|             |           |             |           |             |           | 3.95        | 24.34     |               |           |
|             |           |             |           |             |           | 3.87        | 24.39     |               |           |
|             |           |             |           |             |           | 3.70        | 24.47     |               |           |
|             |           |             |           |             |           | 3.59        | 24.53     |               |           |
|             |           |             |           |             |           | 3.30        | 24.68     |               |           |
|             |           |             |           |             |           | 2.89        | 24.88     |               |           |

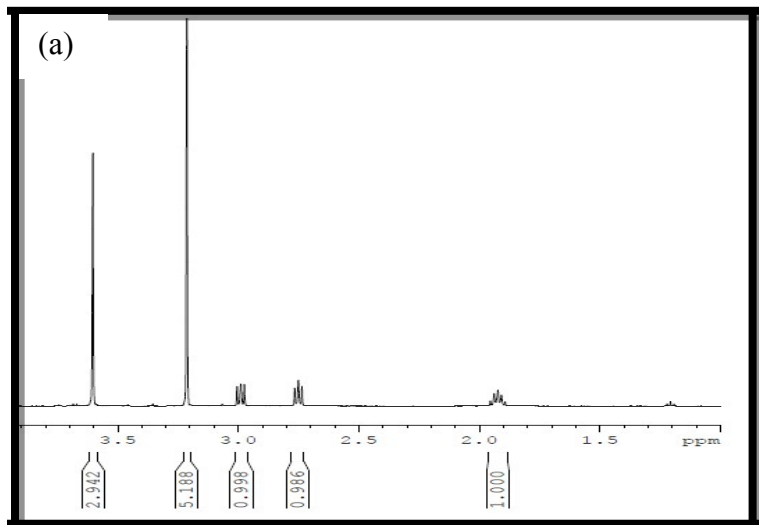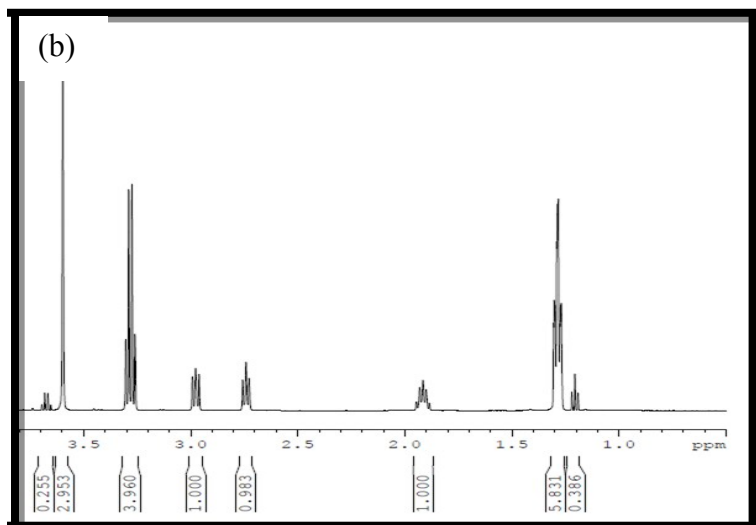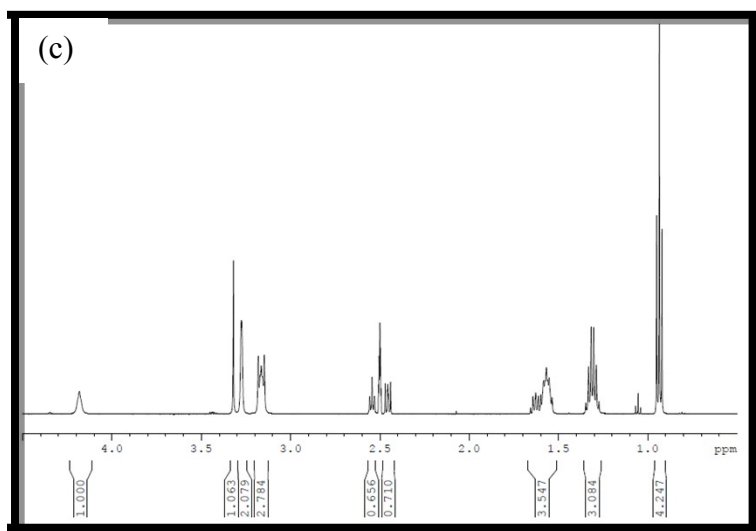

**Fig. S. 1.** The  $^1\text{H}$  NMR spectras of TAPS based GBILs: (a), [TMA][TAPS] in  $\text{D}_2\text{O}$ ; (b), [TEA][TAPS] in  $\text{D}_2\text{O}$ ; (c); [TBA][TAPS] in DMSO.

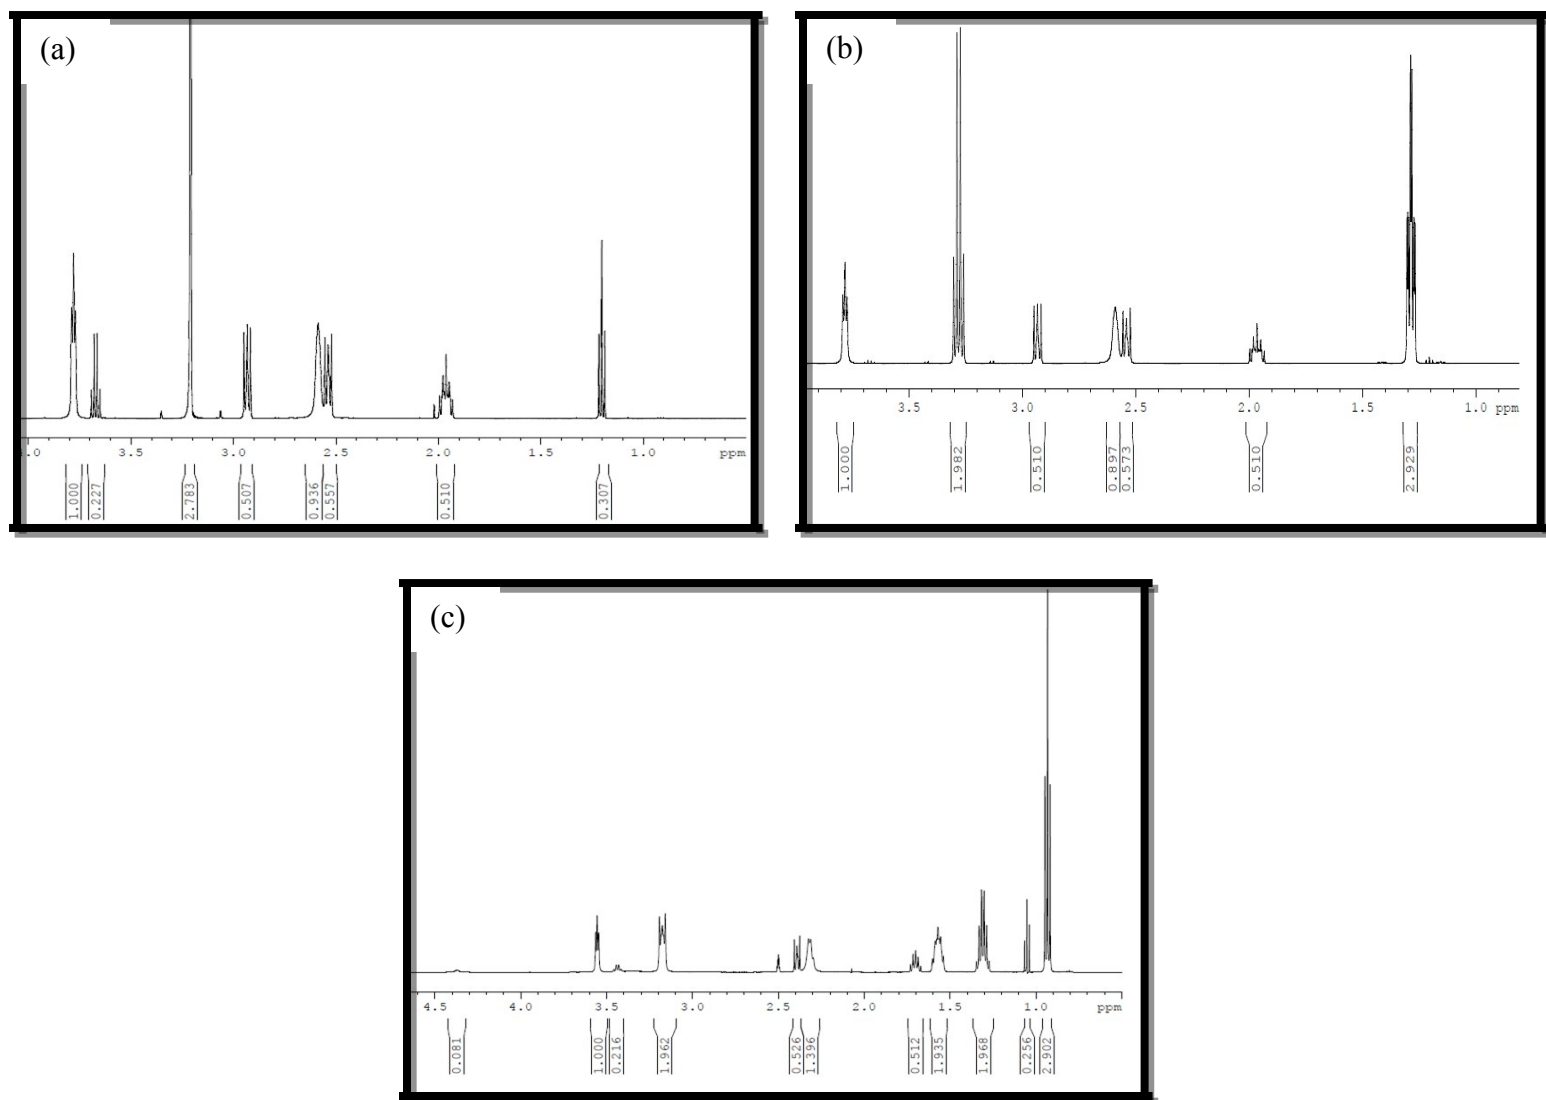

**Fig. S. 2.** The  $^1\text{H}$  NMR spectra of MOPS based GBILs: (a), [TMA][MOPS] in  $\text{D}_2\text{O}$ ; (b), [TEA][MOPS] in  $\text{D}_2\text{O}$ ; (c); [TBA][MOPS] in DMSO.



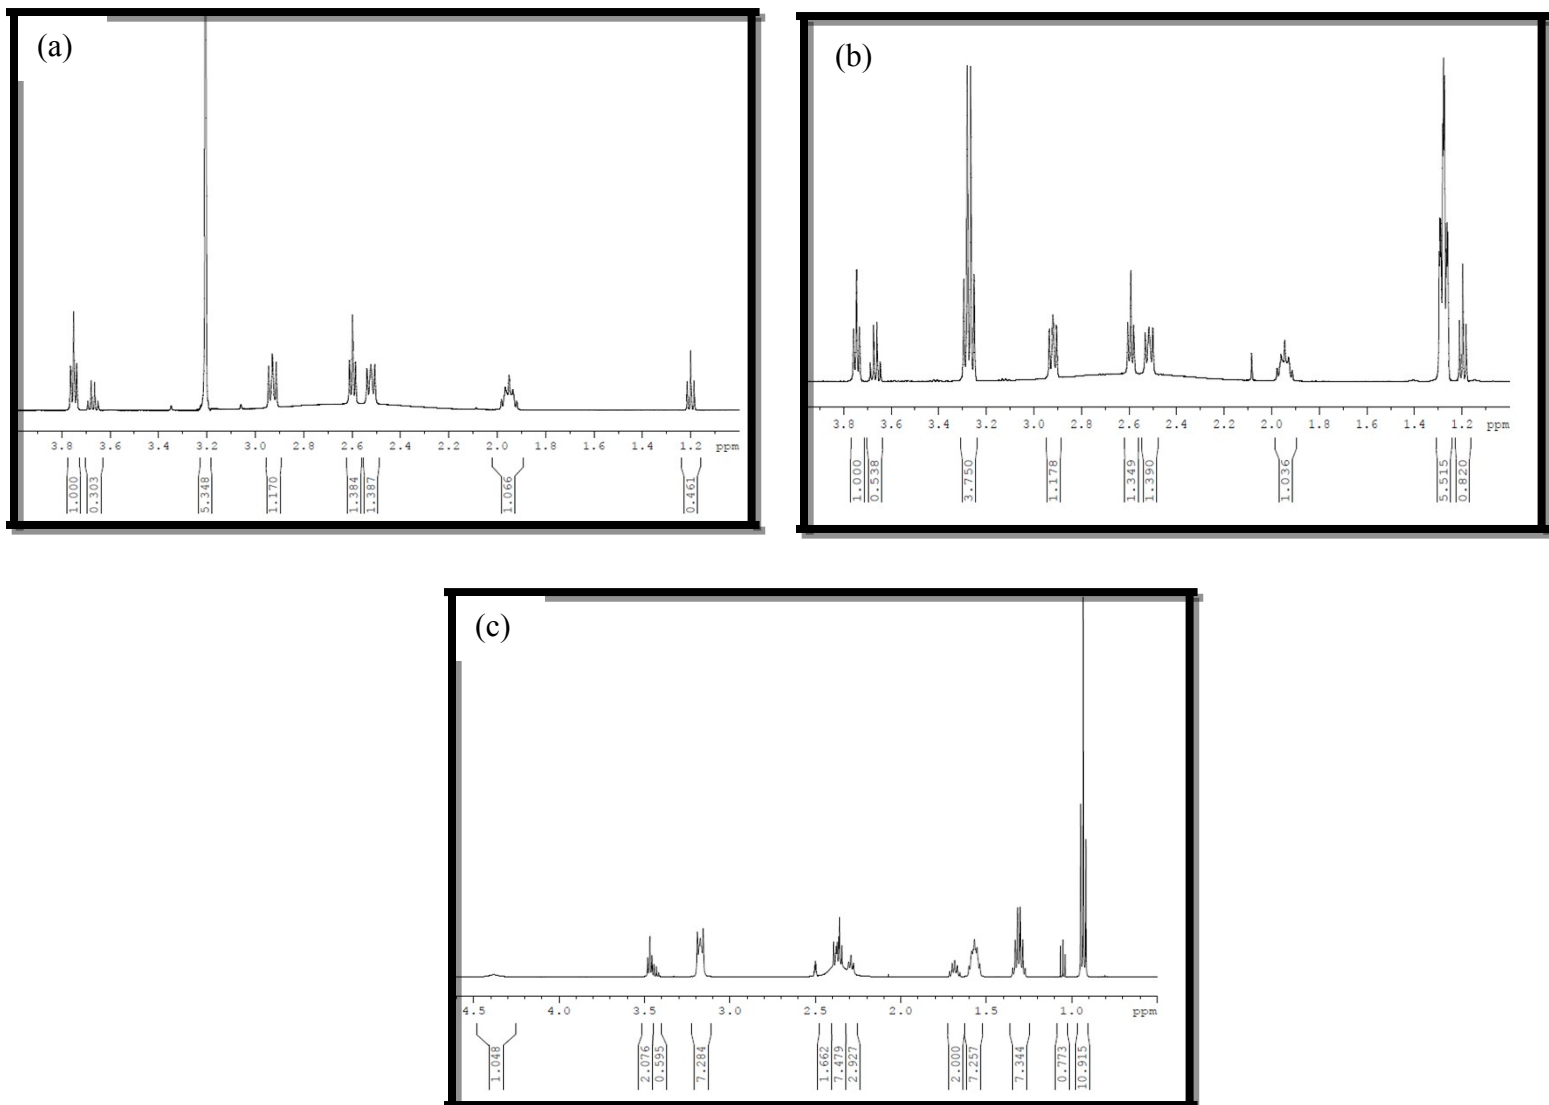

**Fig. S. 3.** The  $^1\text{H}$  NMR spectra of EPPS based GBILs: (a), [TMA][EPPS] in  $\text{D}_2\text{O}$ ; (b), [TEA][EPPS] in  $\text{D}_2\text{O}$ ; (c); [TBA][EPPS] in DMSO.

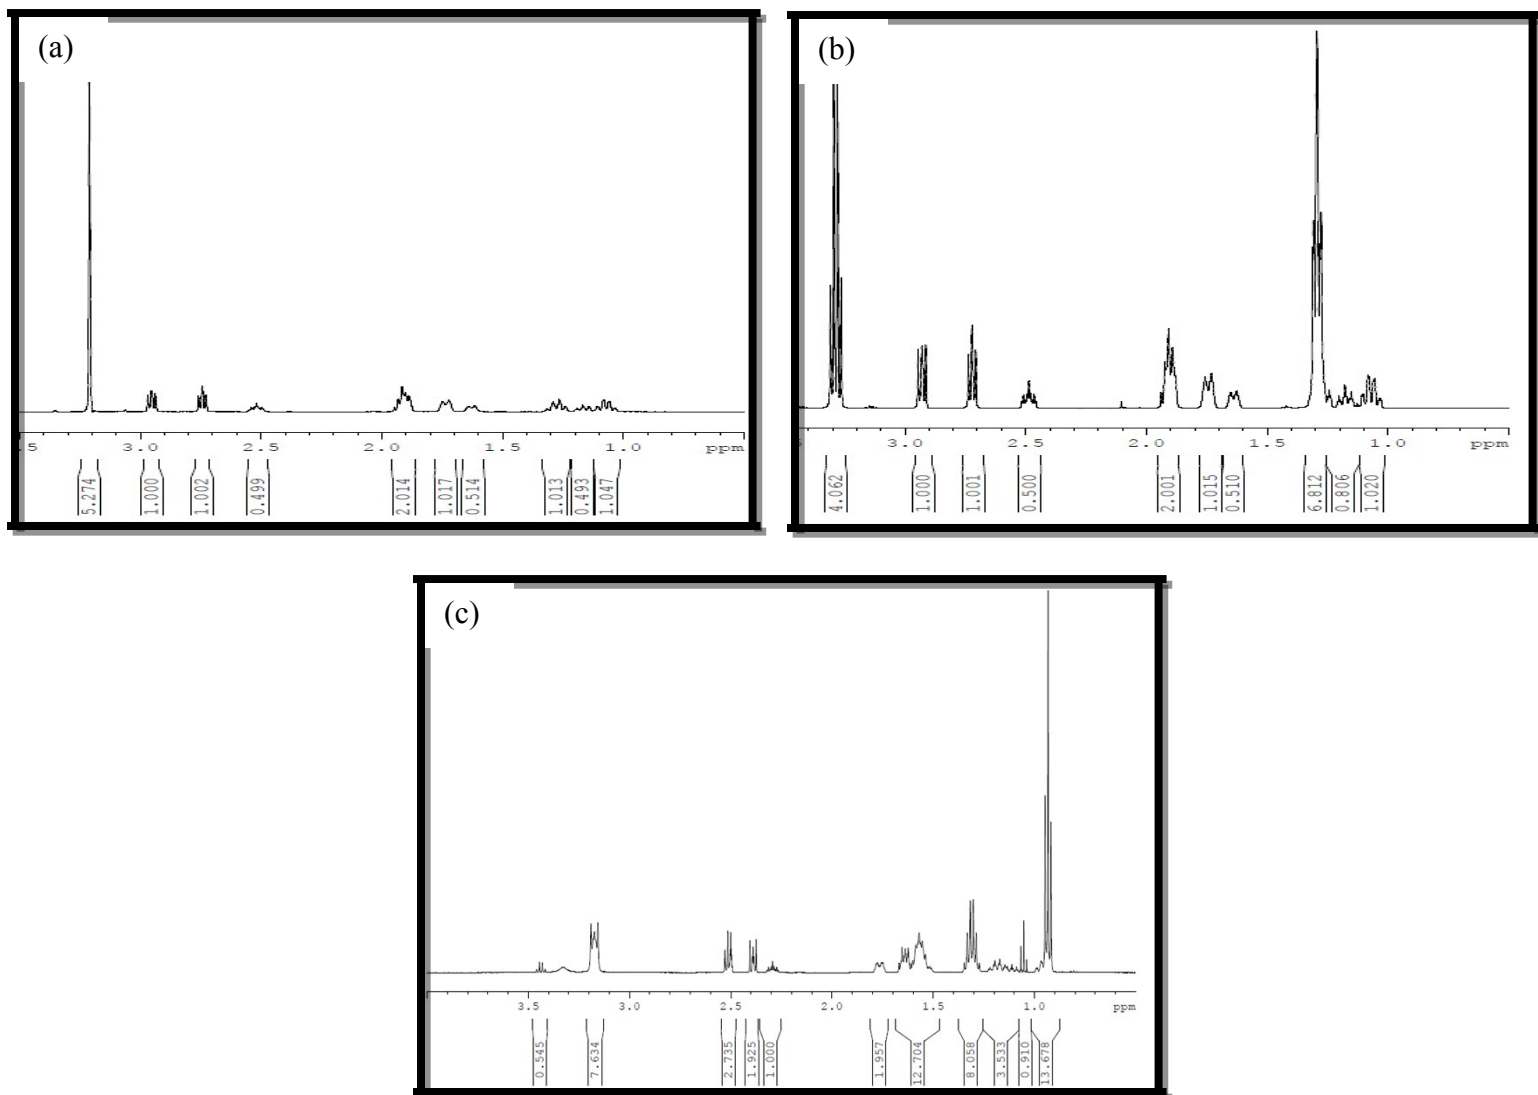

**Fig. S. 4.** The  $^1\text{H}$  NMR spectra of CAPS based GBILs: (a), [TMA][CAPS] in  $\text{D}_2\text{O}$ ; (b), [TEA][CAPS] in  $\text{D}_2\text{O}$ ; (c); [TBA][CAPS] in DMSO.

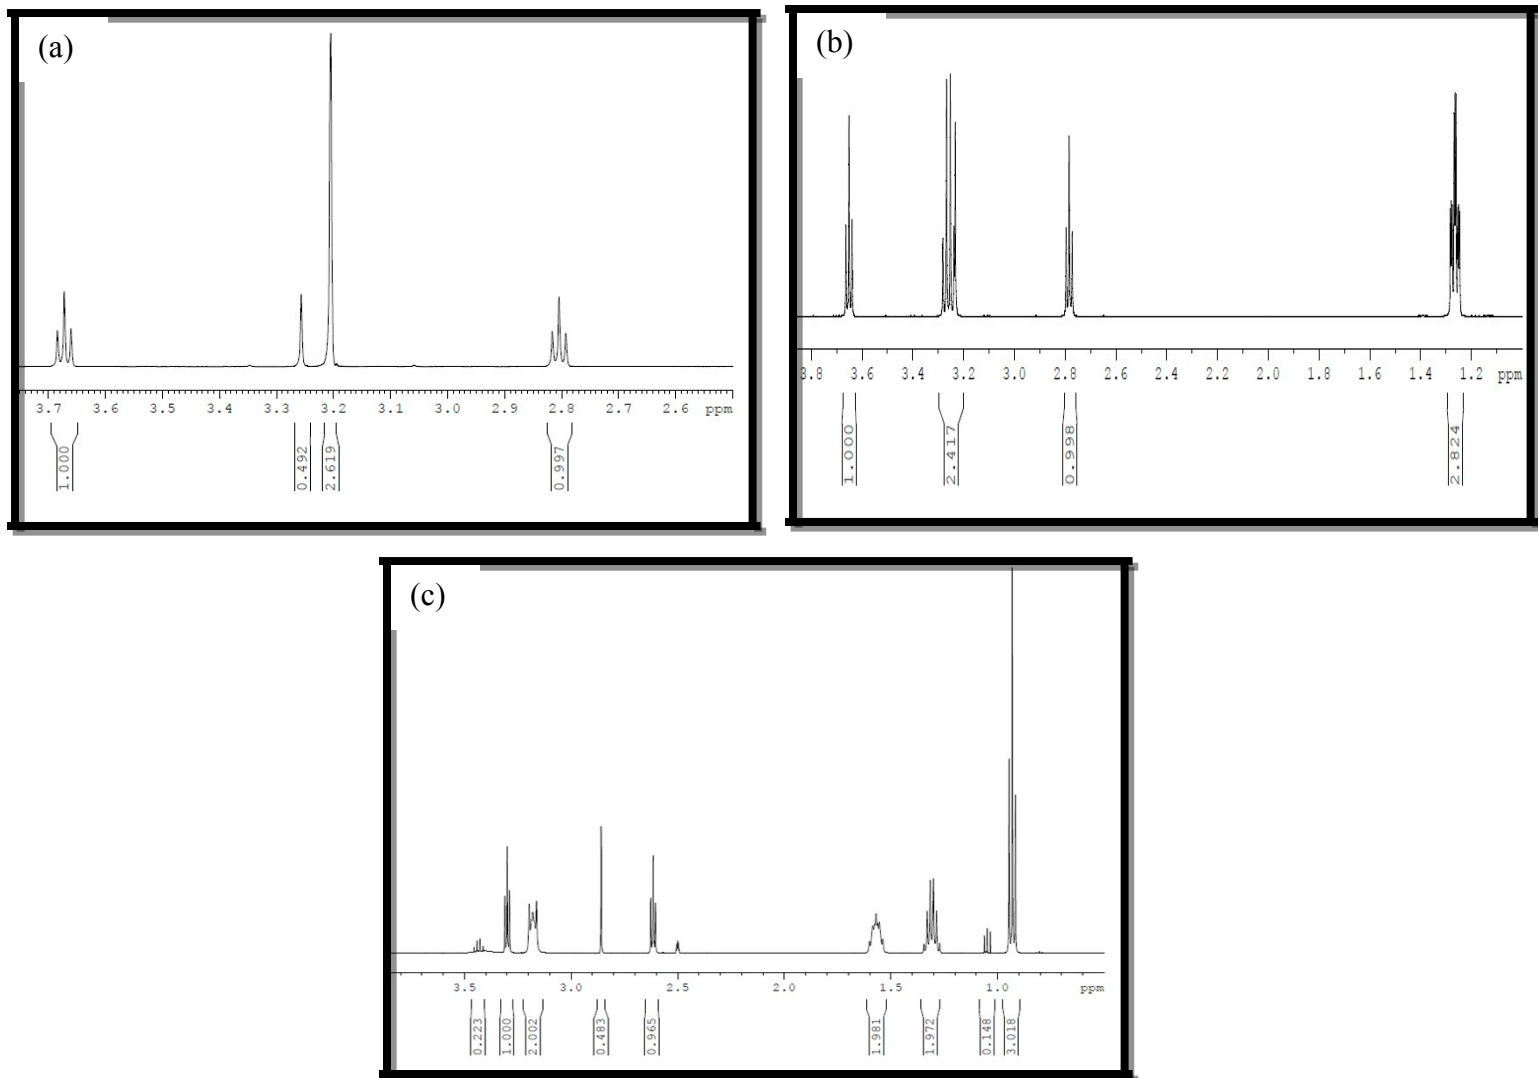

**Fig. S. 5.** The  $^1\text{H}$  NMR spectra of CAPS based GBILs: (a), [TMA][CAPS] in  $\text{D}_2\text{O}$ ; (b), [TEA][CAPS] in  $\text{D}_2\text{O}$ ; (c); [TBA][CAPS] in DMSO.

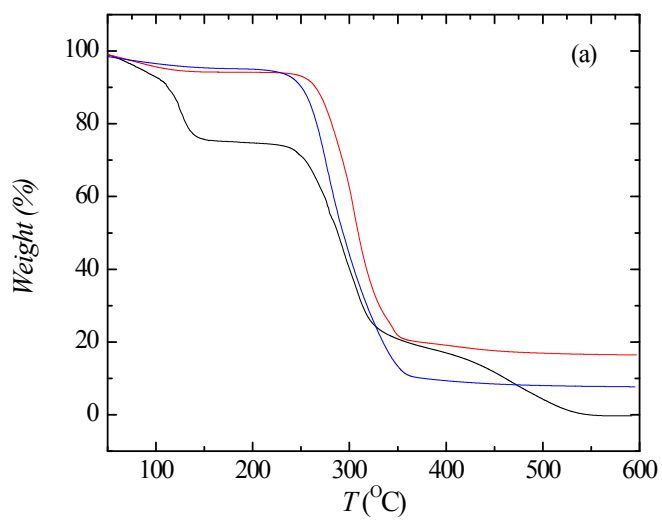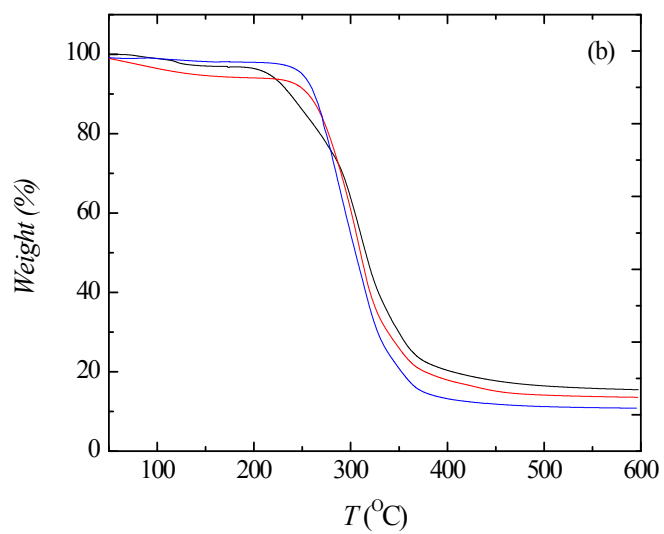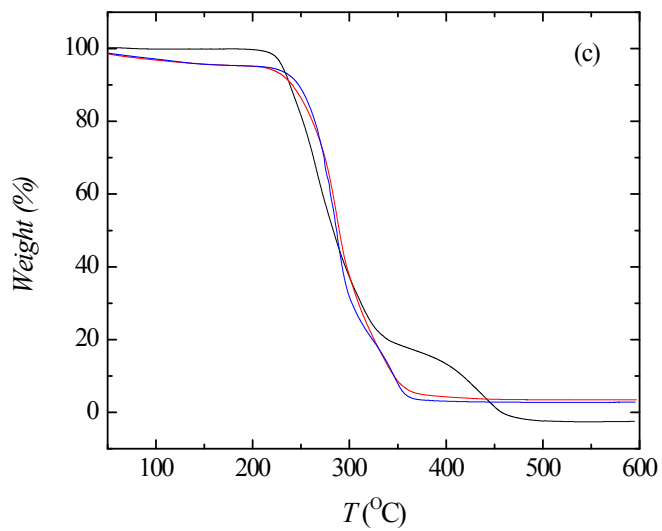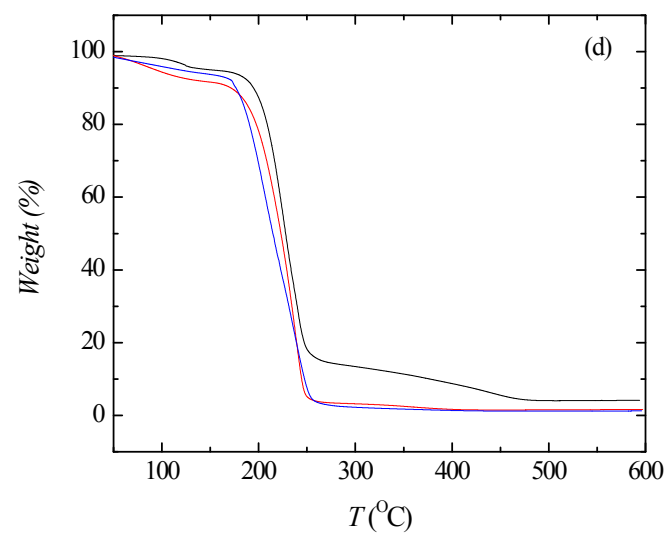

**Fig. S. 6.** Thermal profiles of the synthesized MOPS based GBILs (a), EPPS based GBILs (b), CAPS based GBILs (c), and BICINE based GBILs (d): (-), TMA based ILs; (-), TEA based ILs; and (-), TBA based ILs.

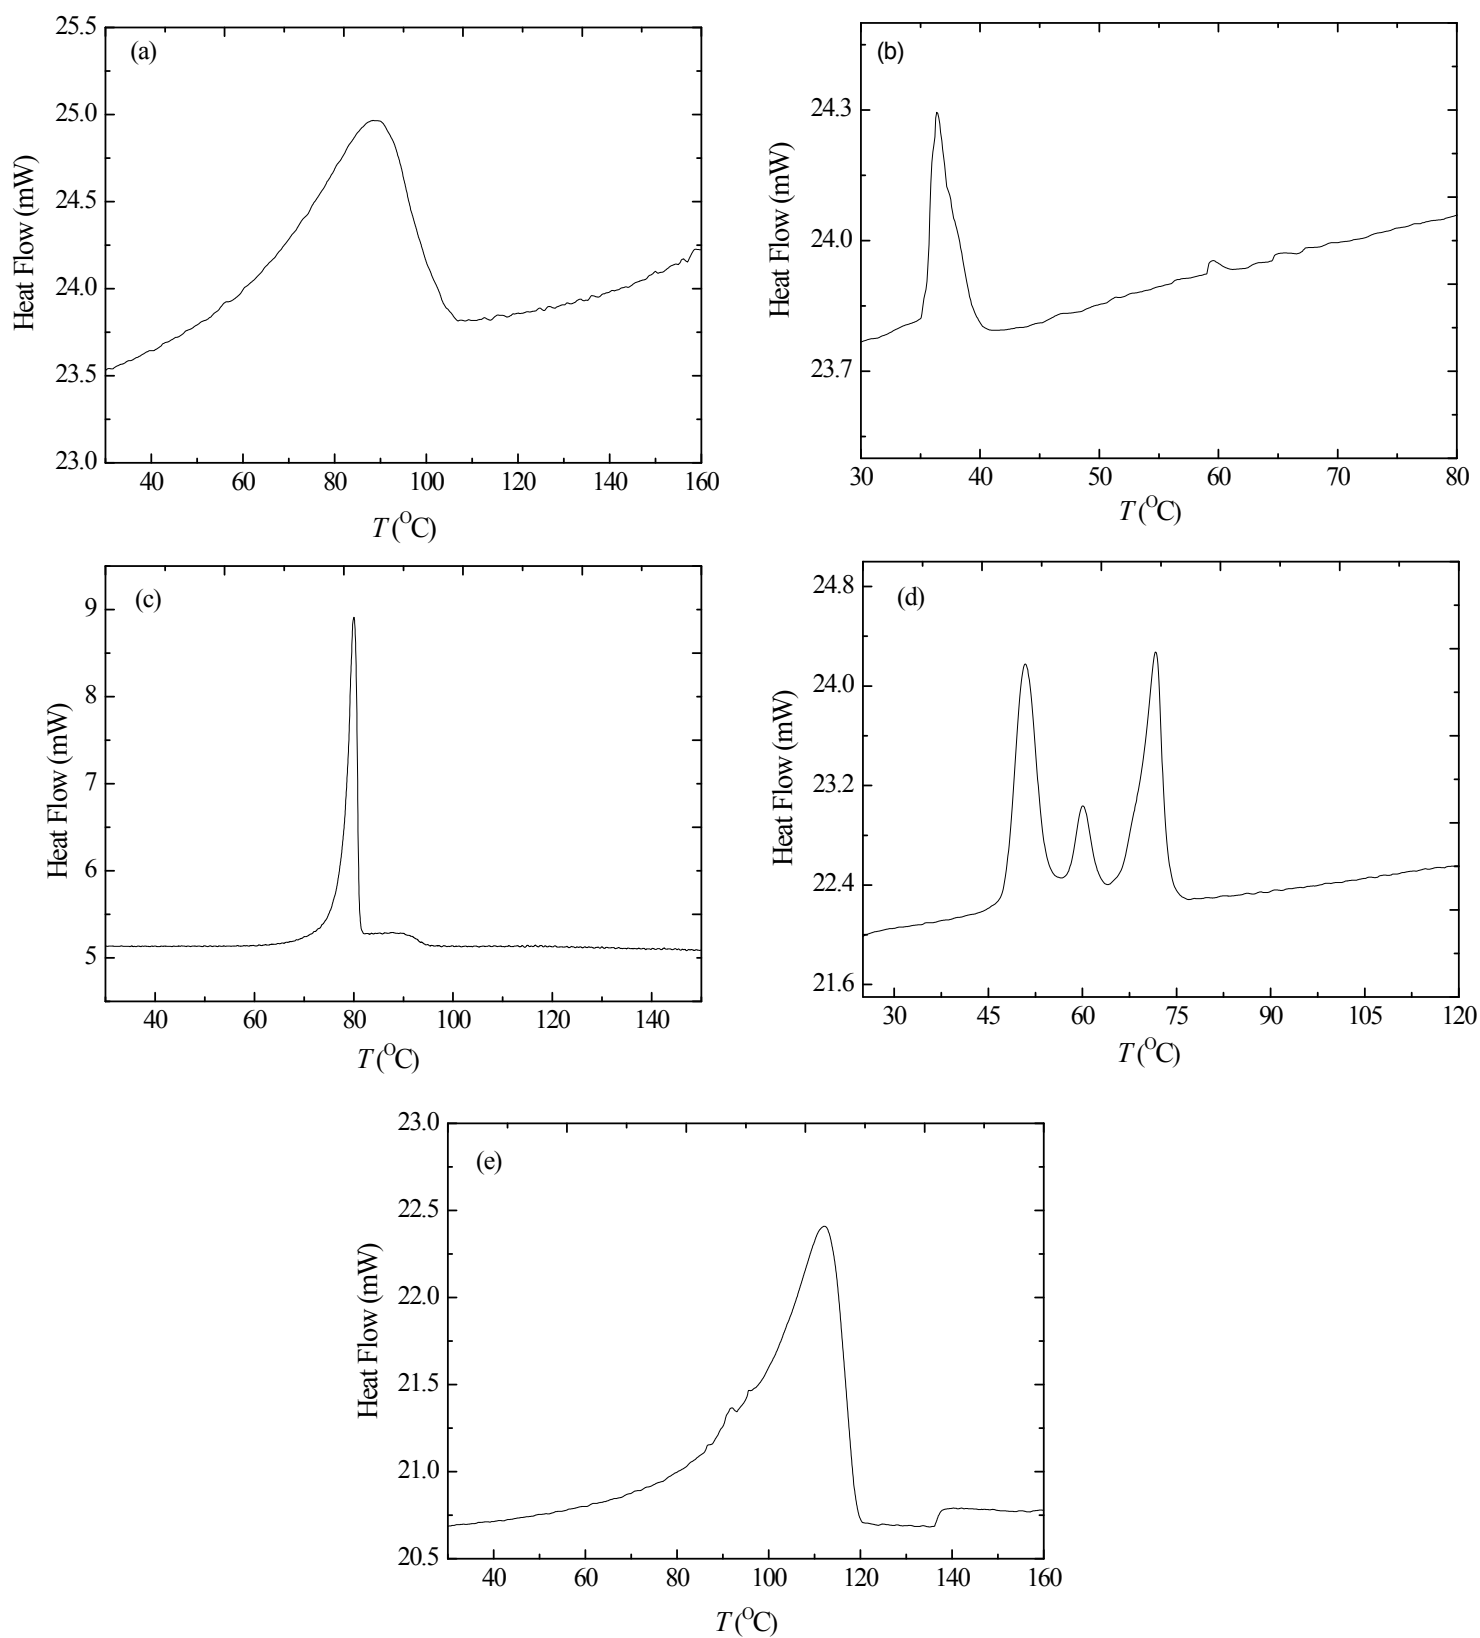

**Fig. S. 7.** Melting curves of the synthesized GBILs: (a), [TMA][TAPS]; (b), [TMA][MOPS]; (c), [TMA][EPPS]; (d), [TMA][CAPS]; (e), [TMA][BICINE].

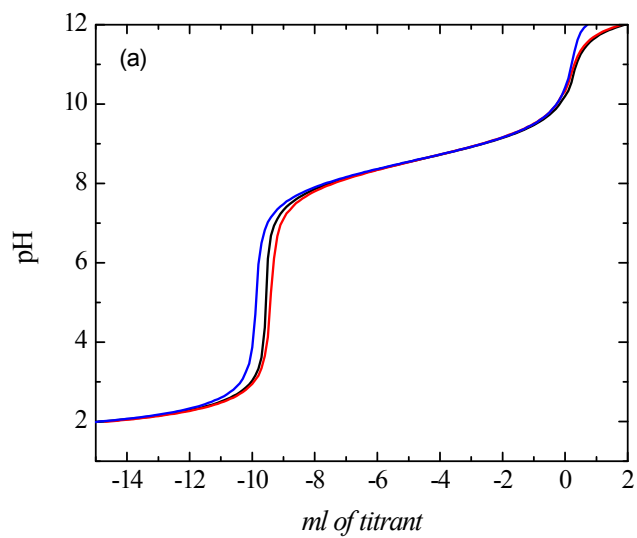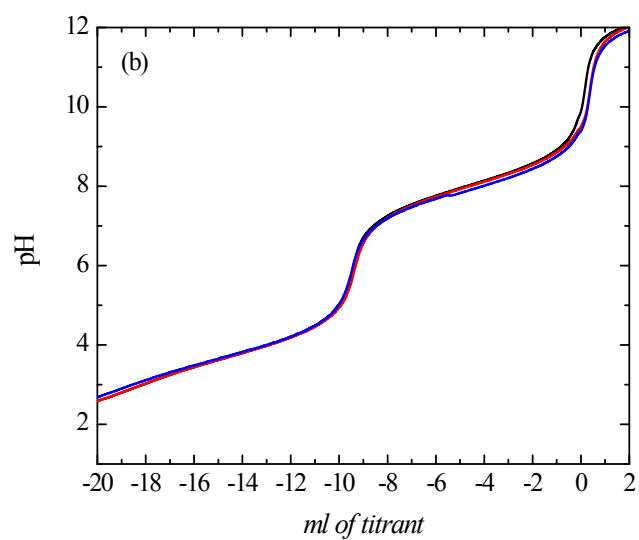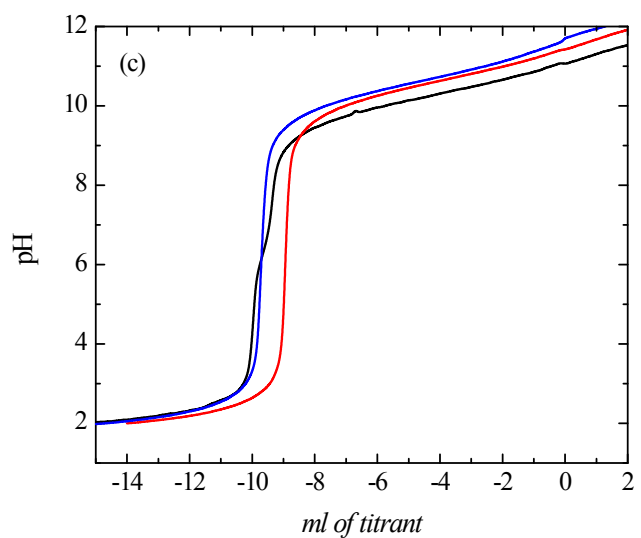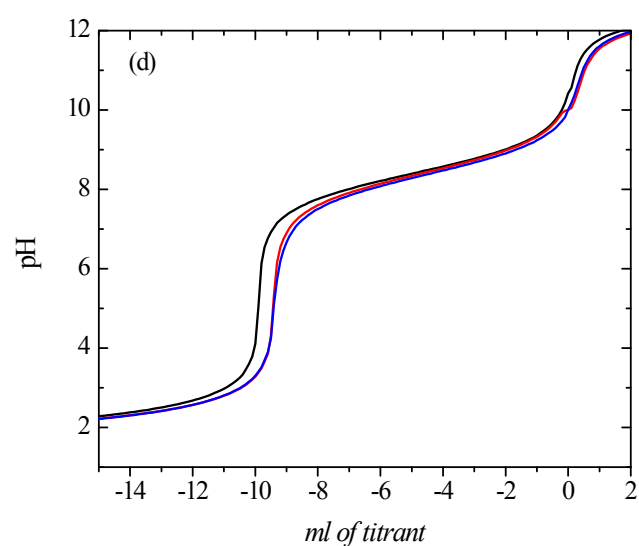

**Fig. S. 8.** pH profiles of the synthesized TAPS based GBILs (a), EPPS based GBILs (b), CAPS based GBILs (c), and BICINE based GBILs (d): (-), TMA based ILs; (-), TEA based ILs; and (-), TBA based ILs.

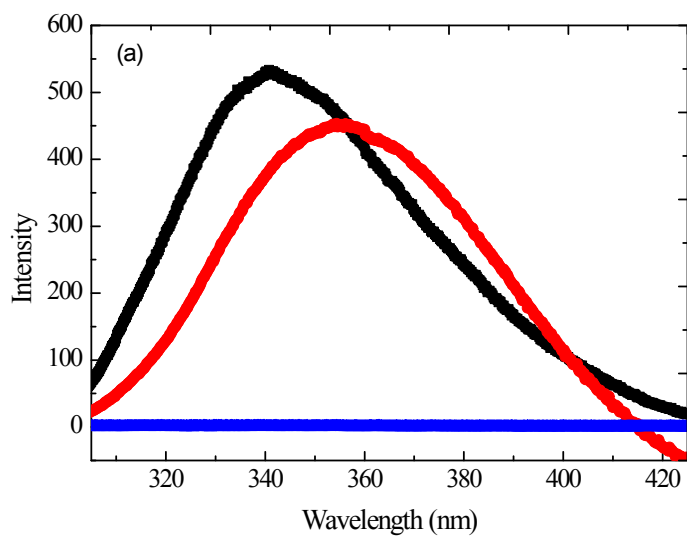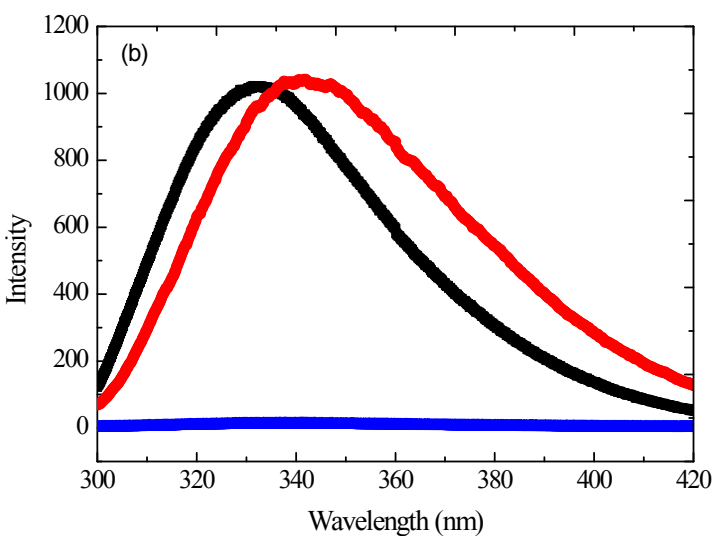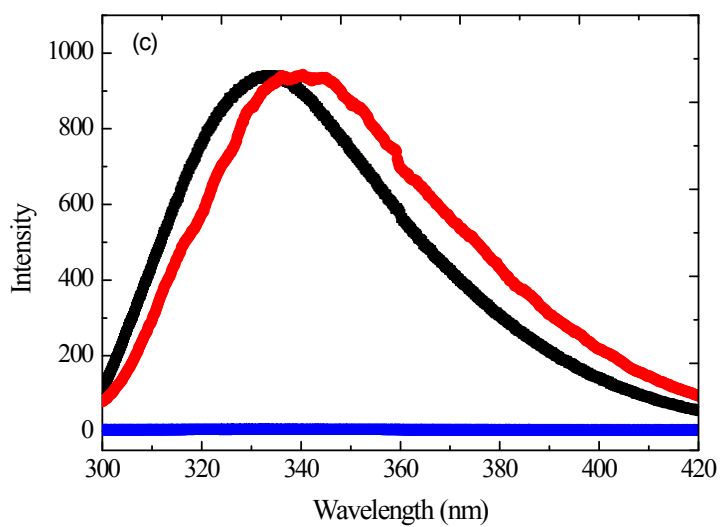

**Fig. S. 9.** The fluorescence spectra of  $\alpha$ -chymotrypsin in [TBA][MOPS] (a), [TBA][EPPS] (b), and [TBA][BICINE] (c) before and after extraction: (■);  $\alpha$ -chymotrypsin in aqueous GBIL solution before extraction, (●);  $\alpha$ -chymotrypsin in upper phase after extraction, (■);  $\alpha$ -chymotrypsin in lower phase after extraction.
